# Supplementary material
Source: HighWire-hosted journal article supplement (https://sit.bmj.com/highwire/filestream/336/field_highwire_adjunct_files/1/bmjsit-2021-000088supp002_data_supplement.pdf)
Supplement: bmjsit-2021-000088supp002_data_supplement.pdf [file bmjsit-2021-000088supp002_data_supplement.pdf]

Supplementary Table 2: Perfusion assessment in upper GI surgery

Table with columns: Ref No., Author, Country, Journal, Year, Study design, Patient selection, N (cases), Fluorographic agent, Dose, Imaging techniques, Route, Timing, Imaging system, Quantitative measurement, Main endpoints, Imaging accuracy/success rate, Endpoint measures (Clinical impact, change in intraoperative decision-making, Clinical impact, advantages in postoperative outcomes), Adverse effects, Learning curve, Cost analysis, Other comments, Ref. detail.

Supplementary Table 2: Perfusion assessment in upper GI surgery

| Ref. No. | Author   | Country | Journal                        | Year | Study design  | Patient selection<br>Subject                         | N (cases)                                               | Fluorographic agent | Dose               | Imaging techniques<br>Route | Timing                                                                                                                                                    | Imaging system                   | Quantitative measurement                                            | Main endpoints                                               | Imaging accuracy/success rate                          | Endpoint measures<br>Clinical impact, changes in intraoperative decision-making                                                                                                      | Clinical impact, advantages to postoperative outcomes<br>Patient compliance, patient satisfaction                                  | Adverse effects | Learning curve | Cost analysis                                                                                             | Other comments                                                                                                                                                                   | Ref. detail                                                                                                                                                                      |
|----------|----------|---------|--------------------------------|------|---------------|------------------------------------------------------|---------------------------------------------------------|---------------------|--------------------|-----------------------------|-----------------------------------------------------------------------------------------------------------------------------------------------------------|----------------------------------|---------------------------------------------------------------------|--------------------------------------------------------------|--------------------------------------------------------|--------------------------------------------------------------------------------------------------------------------------------------------------------------------------------------|------------------------------------------------------------------------------------------------------------------------------------|-----------------|----------------|-----------------------------------------------------------------------------------------------------------|----------------------------------------------------------------------------------------------------------------------------------------------------------------------------------|----------------------------------------------------------------------------------------------------------------------------------------------------------------------------------|
| 29       | Dahm     | US      | Am J Surg                      | 2018 | Retrospective | Minimally invasive Ivo Lewis esophagectomy           | 40 (20 received ICG-VA and 20 did not receive ICG-VA)   | ICG                 | 7.5 mg             | IV                          | Unclear (the implication is that this was vascularised after anastomosis)                                                                                 | Fu/Paint (Neovision)NA           | Ascus blood supply to gastric conduit to reduce anastomotic leakage | NA                                                           | ICG-VA prompted resection in six out of 20 cases (30%) | Temperature did not vary between the two groups; anastomotic leakage occurred in two patients (10%) who received ICG-VA, no leakage developed in patients who did not receive ICG-VA | NA                                                                                                                                 | NA              | NA             | ICG-VA did not reduce leakage rate in Surg. 2018; Sep; 21(6):524-527. doi: 10.1016/j.amjsurg.2017.11.026. | Dahm HA, Ali AA, Cuschak M, Avast ZT. Am J Surg. 2018; Sep; 21(6):524-527. doi: 10.1016/j.amjsurg.2017.11.026.                                                                   |                                                                                                                                                                                  |
| 30       | Noma     | Japan   | J Am Coll Surg                 | 2018 | Retrospective | Esophagectomy with gastric conduit reconstruction    | 285 (71 received ICG-VA and 214 did not receive ICG-VA) | ICG                 | 12.5 mg            | IV                          | After cervical lymph node dissection                                                                                                                      | PDFI (Fluorimetry Phosor)NA      | Ascus blood supply to gastric conduit to avoid complications        | NA                                                           | NA                                                     | One patient in the ICG group and one patient in the non-ICG group died                                                                                                               | One patient in the ICG group and one patient in the non-ICG group died                                                             | NA              | NA             | NA                                                                                                        | Noma K, Shirakawa Y, Kasuya N, Okada T, Maeda S, Niimura T, Tanabe S, Sakurama K, Fujiwara T. J Am Coll Surg. 2018; Mar; 226(3):241-251. doi: 10.1016/j.jamcollsurg.2017.11.007. | Noma K, Shirakawa Y, Kasuya N, Okada T, Maeda S, Niimura T, Tanabe S, Sakurama K, Fujiwara T. J Am Coll Surg. 2018; Mar; 226(3):241-251. doi: 10.1016/j.jamcollsurg.2017.11.007. |
| 31       | Kitagawa | Japan   | Surg Endosc                    | 2018 | Retrospective | Esophagectomy with gastric tube reconstruction       | 72                                                      | ICG                 | 5mg + 10 mL saline | IV                          | Before (n=40) and after (n=26) gastric tube creation                                                                                                      | HyperEye Medical System (HEMS)   | NA                                                                  | Ascus blood supply to gastric tube                           | NA                                                     | NA                                                                                                                                                                                   | Seven patients (9.7%) experienced anastomotic leakage                                                                              | NA              | NA             | NA                                                                                                        | Kitagawa H, Yamamoto I, Yoshida J, Fujiwara K, Uemura S, Tada S, Hamada K. Surg Endosc. 2018; Apr; 32(4):1749-1754. doi: 10.1007/s00464-017-0457-7.                              | Kitagawa H, Yamamoto I, Yoshida J, Fujiwara K, Uemura S, Tada S, Hamada K. Surg Endosc. 2018; Apr; 32(4):1749-1754. doi: 10.1007/s00464-017-0457-7.                              |
| 32       | Huh      | Korea   | J Laparoendosc Adv Surg Tech A | 2019 | Prospective   | Laparoscopic gastrectomy for gastric cancer          | 30                                                      | ICG                 | 2.5-5.0 mg         | IV                          | After anastomosis                                                                                                                                         | Image 1 SPiES (Karl Storz)       | Trends of fluorescence intensity (perfusion score of 1 to 5)        | Ascus blood perfusion                                        | 76.7% (23 out of 30 patients)                          | No changes in the surgical plan                                                                                                                                                      | Only one case of anastomotic leakage occurred; one case of stenosis and one case of fluid collection                               | NA              | NA             | NA                                                                                                        | Huh YJ, Lee HJ, Kim TH, Choi YS, Park JH, Son YG, Suh YS, Kwon SH, Yang HK. J Laparoendosc Adv Surg Tech A. 2019; Apr; 29(4):76-83. doi: 10.1007/s00464-018-0263-3.              | Huh YJ, Lee HJ, Kim TH, Choi YS, Park JH, Son YG, Suh YS, Kwon SH, Yang HK. J Laparoendosc Adv Surg Tech A. 2019; Apr; 29(4):76-83. doi: 10.1007/s00464-018-0263-3.              |
| 33       | Di Fazio | Italy   | Obes Surg                      | 2019 | Retrospective | Laparoscopic sleeve gastrectomy                      | 43                                                      | ICG                 | 5 mL               | IV                          | After construction of the gastric sleeve                                                                                                                  | QPALA1 (Karl Storz)NA            | NA                                                                  | Ascus blood supply to the gastric tube                       | NA                                                     | NA                                                                                                                                                                                   | One patient experienced gastric leak                                                                                               | NA              | NA             | NA                                                                                                        | Di Fazio M, Romano L, Schiavone S, Brambilla D, Lomanto D, Cuccia G, Schiavone M, Carle F, Galliani A. Obes Surg. 2019; Dec; 29(12):3786-3790. doi: 10.1007/s11695-019-04805-3.  | Di Fazio M, Romano L, Schiavone S, Brambilla D, Lomanto D, Cuccia G, Schiavone M, Carle F, Galliani A. Obes Surg. 2019; Dec; 29(12):3786-3790. doi: 10.1007/s11695-019-04805-3.  |
| 34       | Onai     | Italy   | Obes Surg                      | 2019 | Case report   | Modified sleeve gastrectomy with laparoscopic Roux-Y | 1                                                       | ICG                 | NA                 | IV                          | After removal of the bougie                                                                                                                               | Image 1 SPiES (Karl Storz)       | NA                                                                  | Ascus vascularization of the staple line                     | 100%                                                   | Intraoperative course was uneventful                                                                                                                                                 | Postoperative course was uneventful                                                                                                | None            | NA             | NA                                                                                                        | Onai S, Uzzelli M. Obes Surg. 2019; Sep; 29(9):3036-3038. doi: 10.1007/s11695-019-01970-w.                                                                                       | Onai S, Uzzelli M. Obes Surg. 2019; Sep; 29(9):3036-3038. doi: 10.1007/s11695-019-01970-w.                                                                                       |
| 35       | Ishige   | Japan   | J Surg Res                     | 2019 | Prospective   | Esophagectomy with gastric conduit reconstruction    | 20                                                      | ICG                 | 1.25 mg            | IV                          | Three times before dissecting the prepyloric vessels, after formation of the gastric tube, and before intrathoracic or cervical esophagectomy-gastrectomy | Olympus (no other details given) | ROGA software                                                       | Quantitative measurement of perfusion in the gastric conduit | NA                                                     | NA                                                                                                                                                                                   | No leakage developed in any of the patients; five cases (25%) had postoperative complications but no anastomotic stenosis or death | NA              | NA             | NA                                                                                                        | Ishige F, Nishiyama Y, Hoshino I, Takayama W, Chiba S, Aomoto H, Iwama Y, Yamaguchi H. J Surg Res. 2019; Feb; 234:105-110. doi: 10.1016/j.jss.2018.08.056.                       | Ishige F, Nishiyama Y, Hoshino I, Takayama W, Chiba S, Aomoto H, Iwama Y, Yamaguchi H. J Surg Res. 2019; Feb; 234:105-110. doi: 10.1016/j.jss.2018.08.056.                       |

NA, not available or not assessed
